# Supplementary material for: A Rab6 to Rab11 transition is required for dense-core granule and exosome biogenesis in Drosophila secondary cells
Source: PubMed Central journal article supplement (PMC10602379; doi:10.1371/journal.pgen.1010979), 2023-10-16

Time (minutes)

DIC

t=0

t=12

t=20

t=36

t=56

YFP-Rab1

CFP-Rab6

All merge

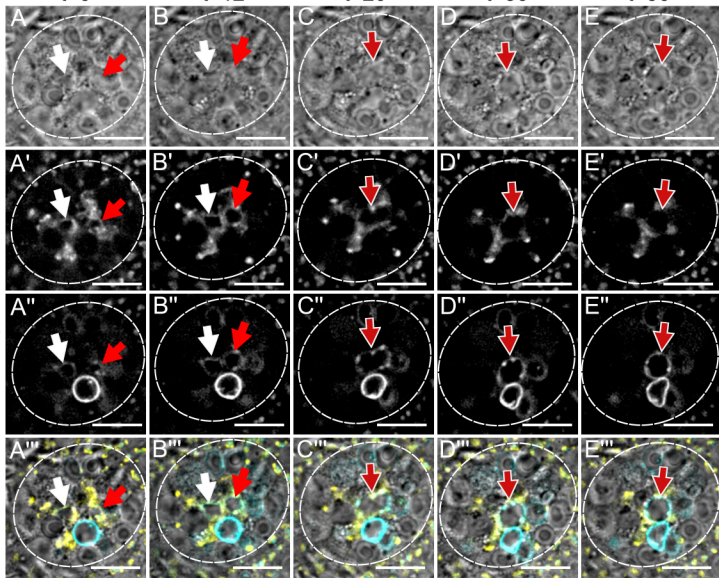

Supplement: pgen.1010979.s003.pdf [file pgen.1010979.s003.pdf]
