# Supplementary material for: A Rab6 to Rab11 transition is required for dense-core granule and exosome biogenesis in Drosophila secondary cells
Source: PubMed Central journal article supplement (PMC10602379; doi:10.1371/journal.pgen.1010979), 2023-10-16

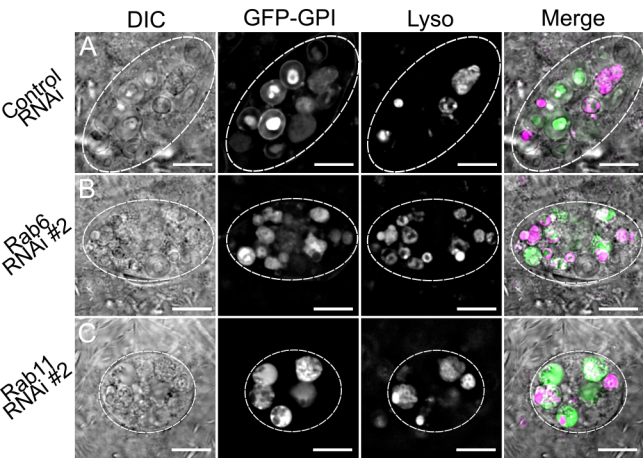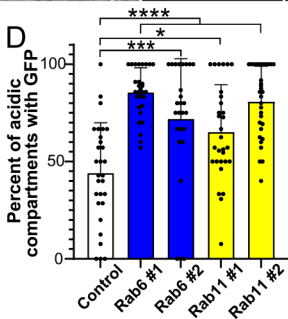

Supplement: pgen.1010979.s007.pdf [file pgen.1010979.s007.pdf]
